# Supplementary material for: Spatiotemporal Spike Coding of Behavioral Adaptation in the Dorsal Anterior Cingulate Cortex
Source: PubMed Central journal article supplement (PMC4534466; doi:10.1371/journal.pbio.1002222), 2015-08-12

# 1<sup>st</sup> reward vs. repetition classification

# Errors vs. repetition classification

**a**

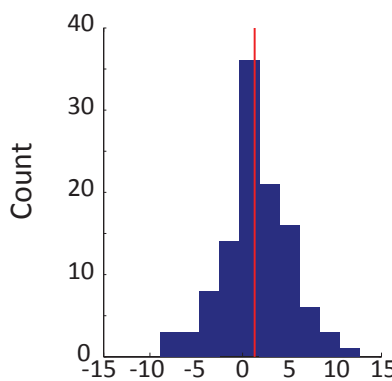

$$D_s = \text{spike count}_{1^{\text{st}} \text{ rew}} - \text{spike count}_{\text{rep}}$$

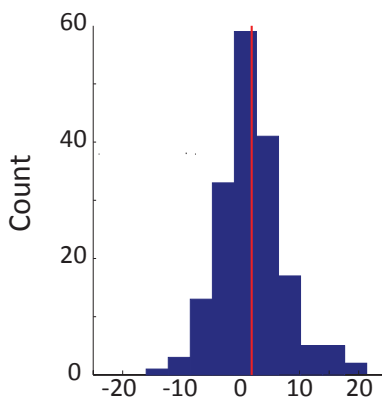

$$\Delta s = \text{spike count}_{\text{err}} - \text{spike count}_{\text{rep}}$$

**b**

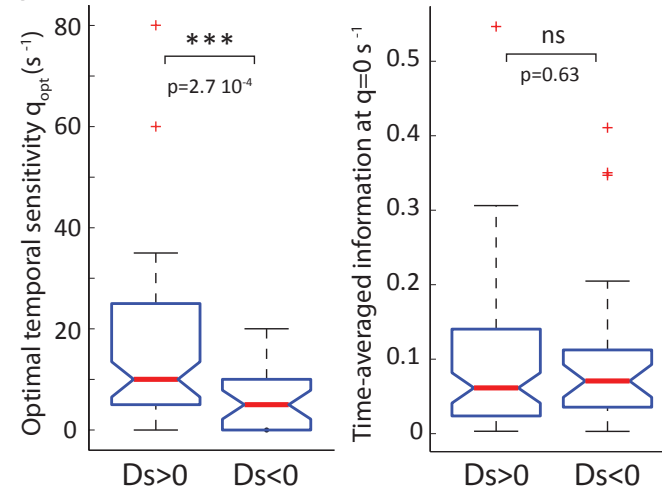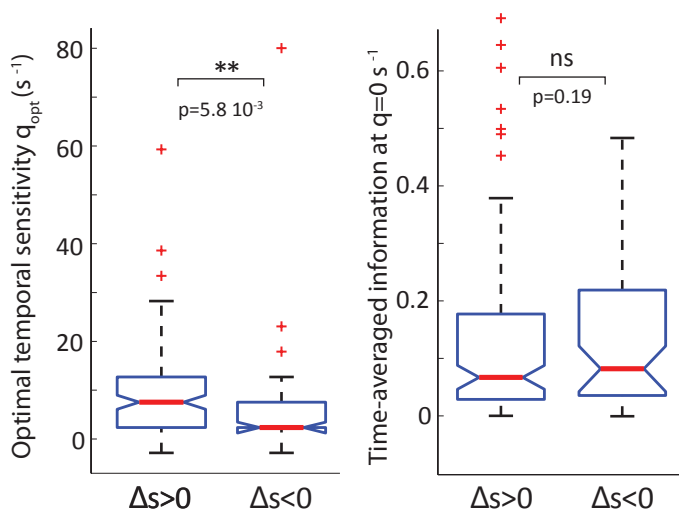

**c**

Neurons significant for 1<sup>st</sup> reward vs. repetition, with  $D_s > 0$

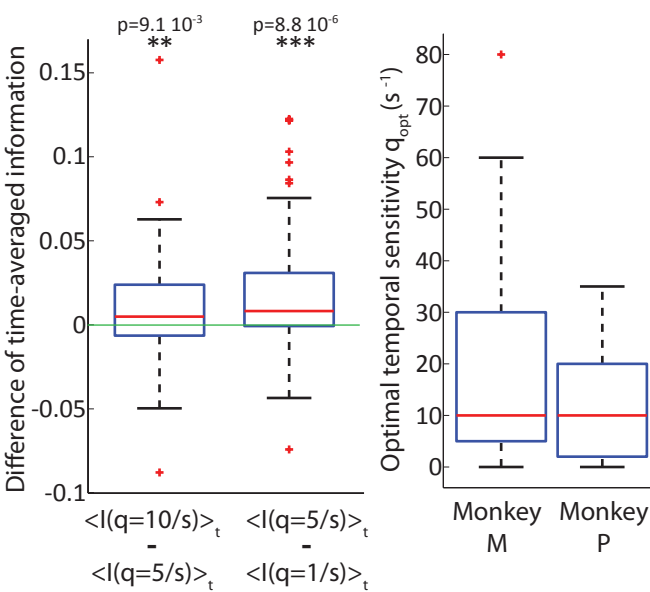

Neurons significant for both errors vs. repetition and 1<sup>st</sup> reward vs. repetition, with  $\Delta s > 0$

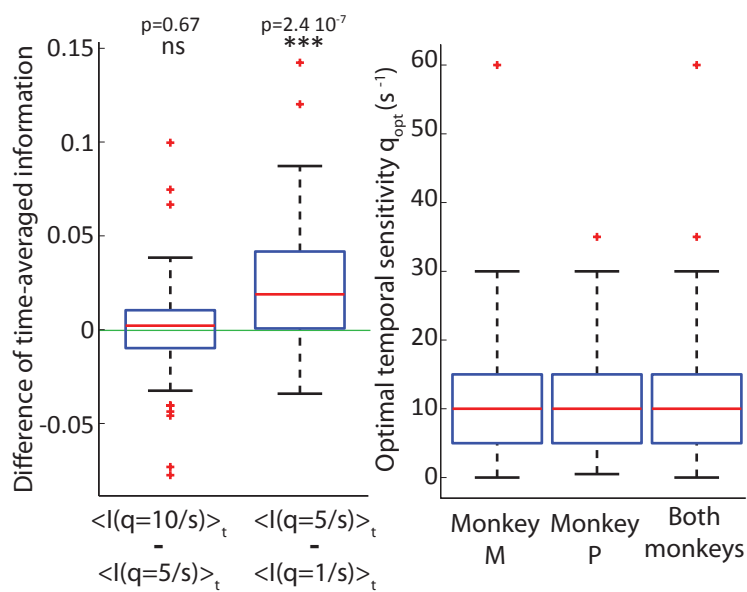

Supplement: pbio.1002222.s004.pdf [file pbio.1002222.s004.pdf]
