# Supplementary material for: Spatiotemporal Spike Coding of Behavioral Adaptation in the Dorsal Anterior Cingulate Cortex
Source: PubMed Central journal article supplement (PMC4534466; doi:10.1371/journal.pbio.1002222), 2015-08-12

# All neurons significant for 1<sup>st</sup> reward vs. errors decoding

# Neurons significant for both 1<sup>st</sup> reward vs. errors and 1<sup>st</sup> reward vs. repetition decodings

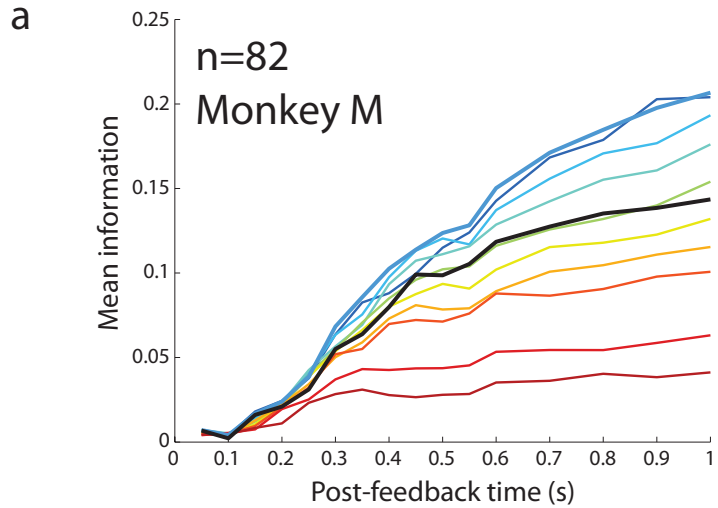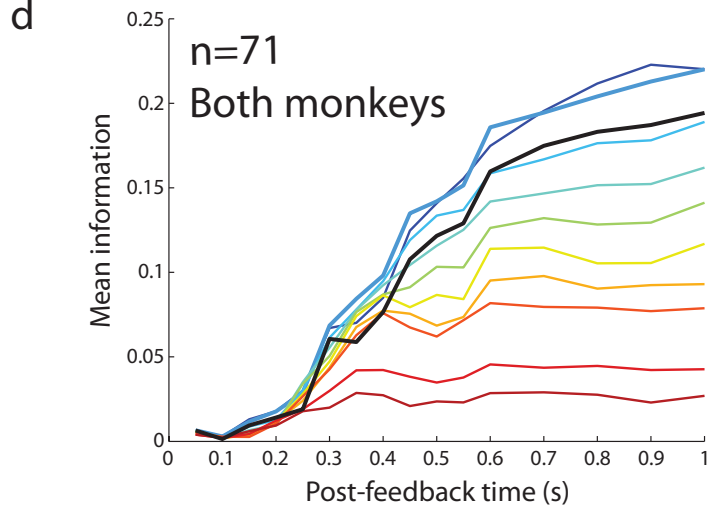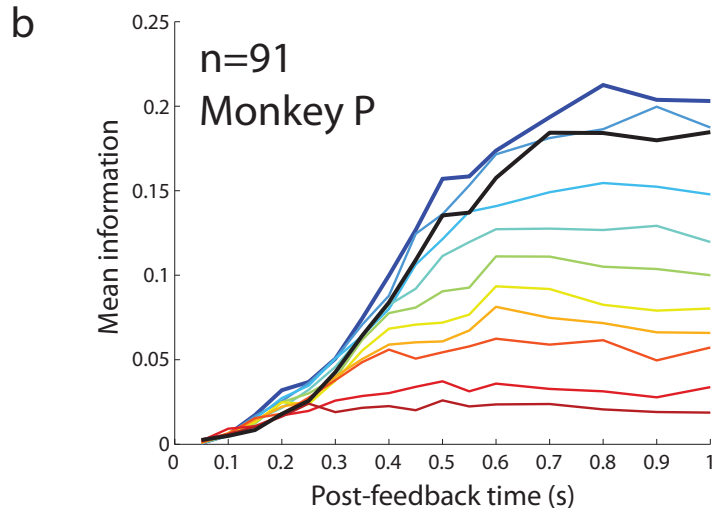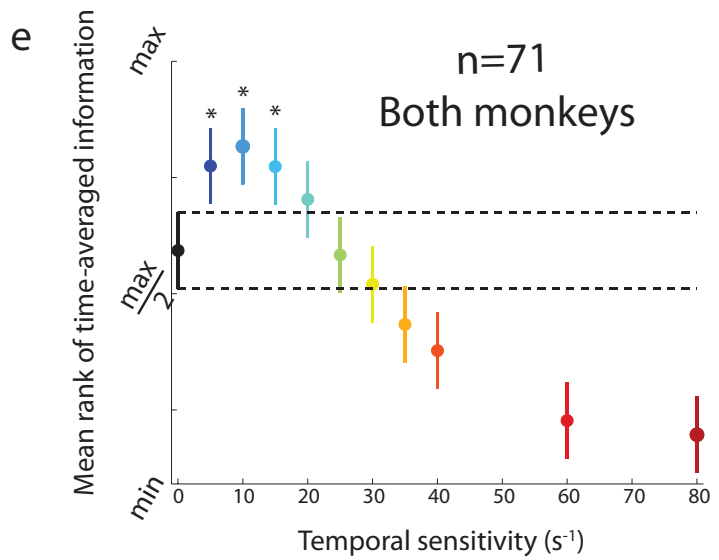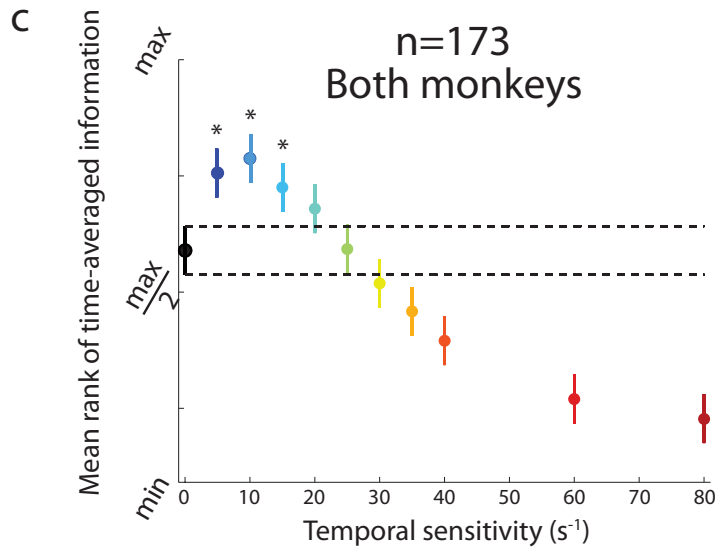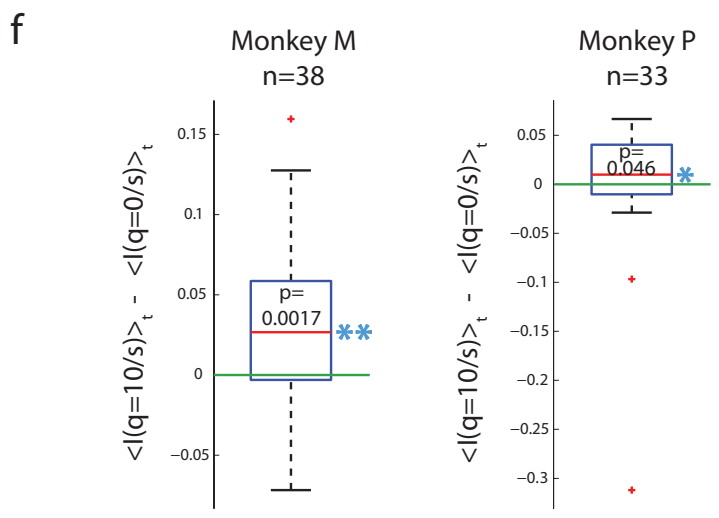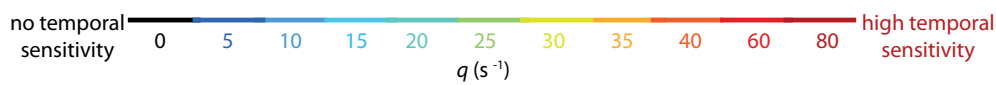

Supplement: pbio.1002222.s007.pdf [file pbio.1002222.s007.pdf]
