# Supplementary material for: Spatiotemporal Spike Coding of Behavioral Adaptation in the Dorsal Anterior Cingulate Cortex
Source: PubMed Central journal article supplement (PMC4534466; doi:10.1371/journal.pbio.1002222), 2015-08-12

a

1<sup>st</sup> reward vs. repetition discrimination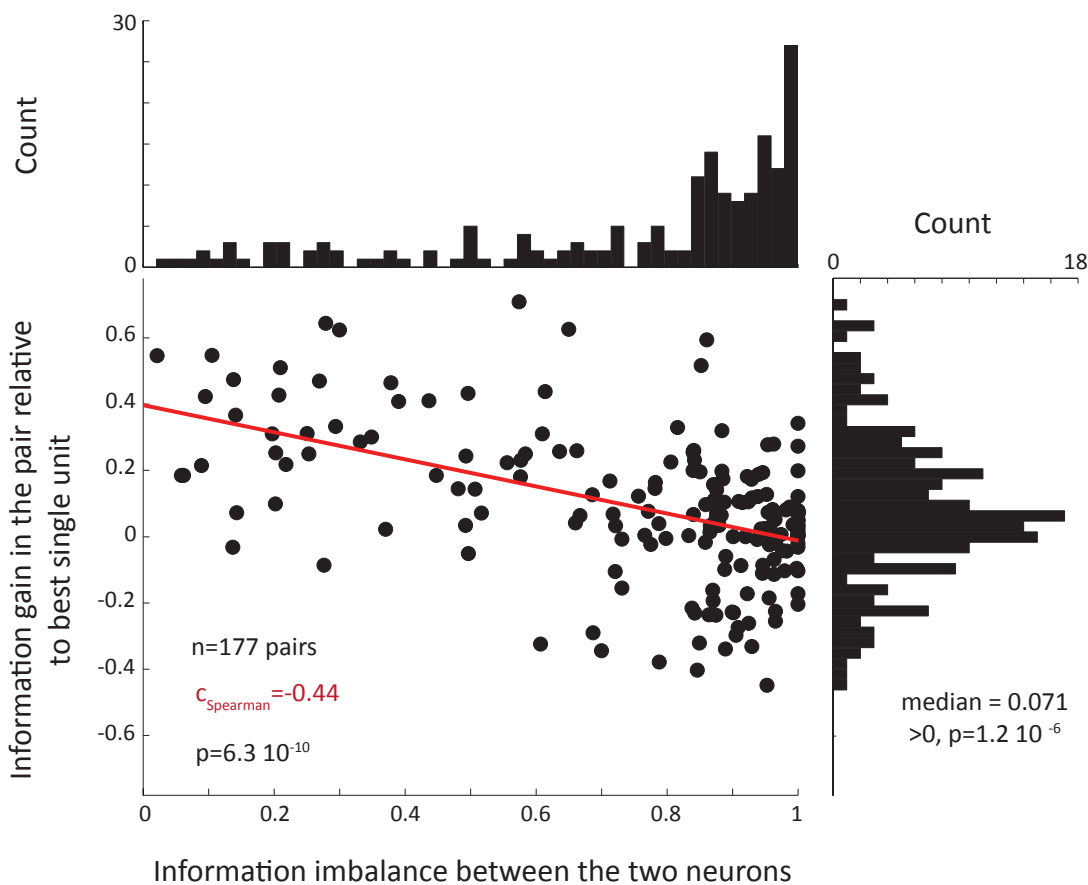

b

## Error vs. repetition discrimination

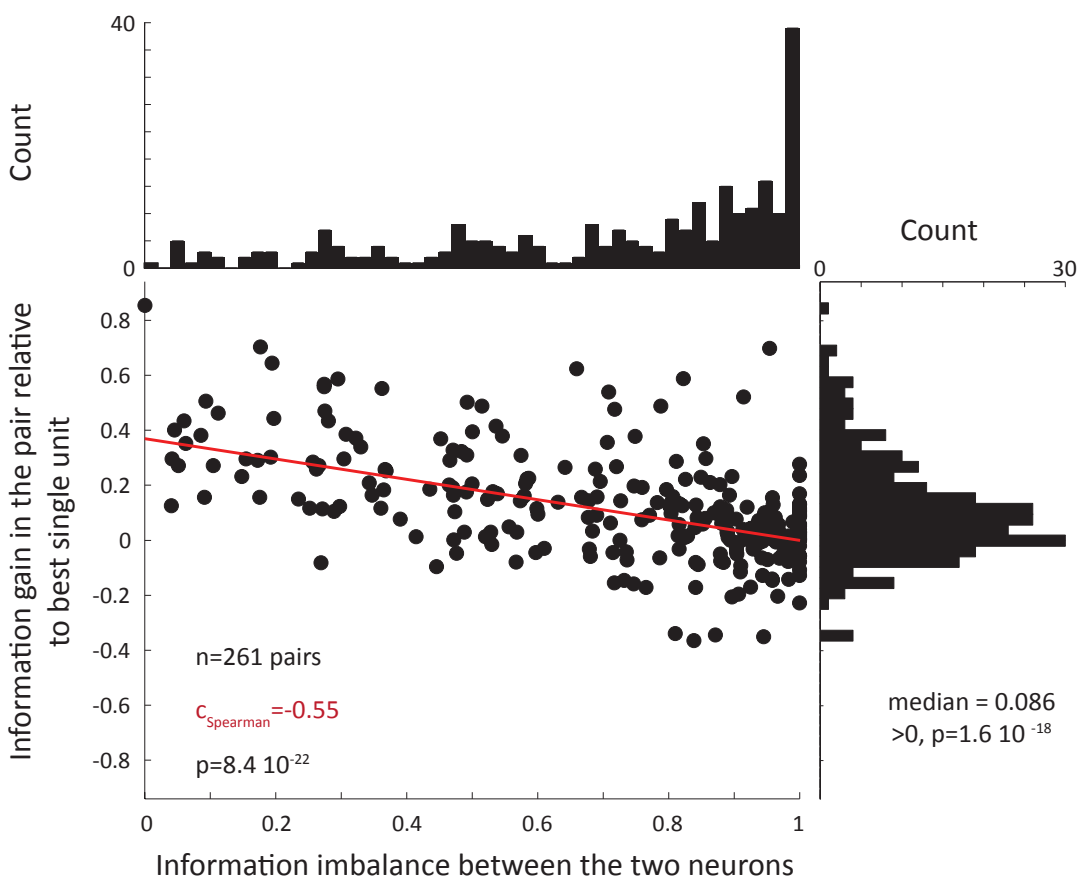

Supplement: pbio.1002222.s009.pdf [file pbio.1002222.s009.pdf]
