# Supplementary material for: Spatiotemporal Spike Coding of Behavioral Adaptation in the Dorsal Anterior Cingulate Cortex
Source: PubMed Central journal article supplement (PMC4534466; doi:10.1371/journal.pbio.1002222), 2015-08-12

# 1<sup>st</sup> reward vs. repetition discrimination

# Errors vs. repetition discrimination

a

Monkey M

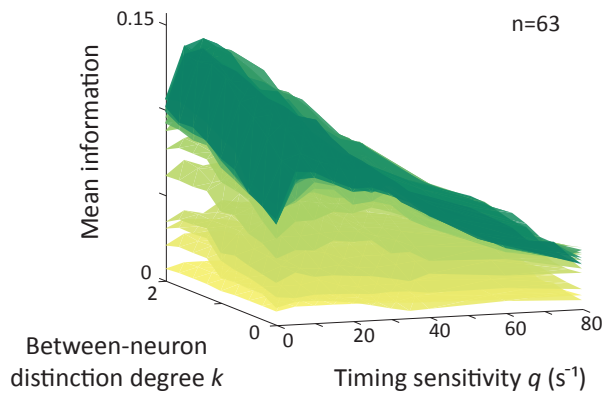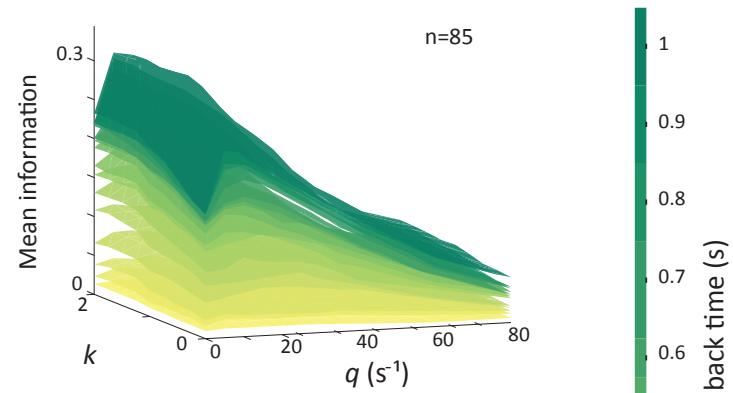

Monkey P

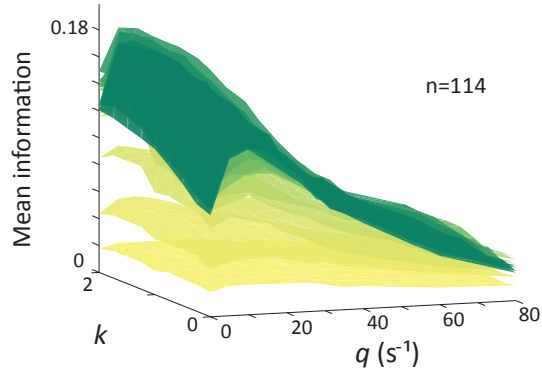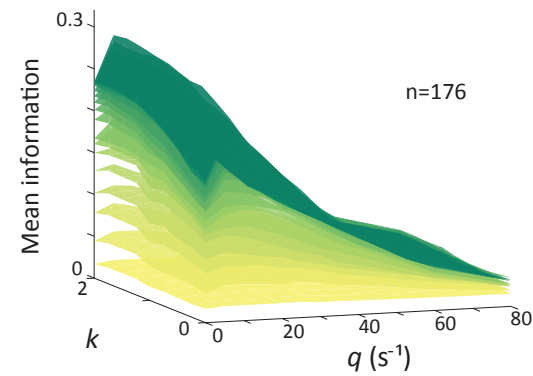

b

Monkey M

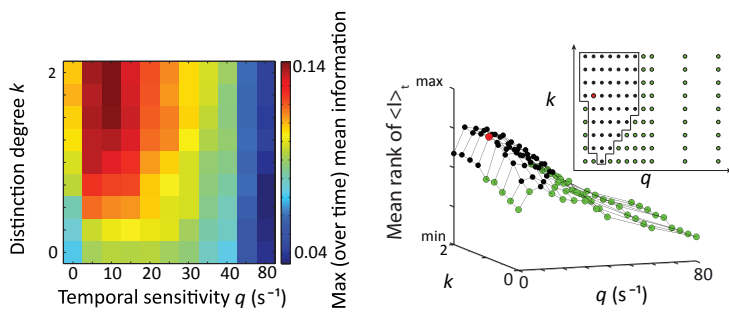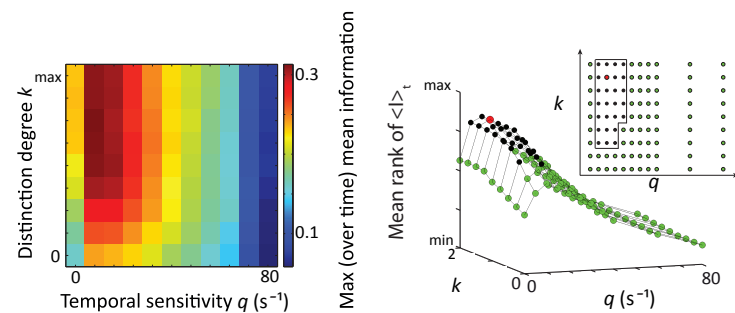

Monkey P

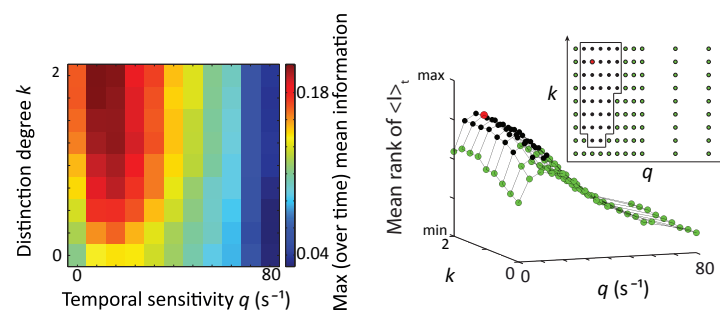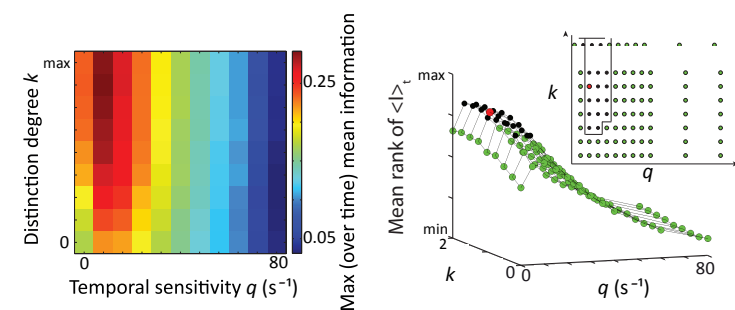

Supplement: pbio.1002222.s010.pdf [file pbio.1002222.s010.pdf]
