# Supplementary material for: Spatiotemporal Spike Coding of Behavioral Adaptation in the Dorsal Anterior Cingulate Cortex
Source: PubMed Central journal article supplement (PMC4534466; doi:10.1371/journal.pbio.1002222), 2015-08-12

## Monkey M

**a**

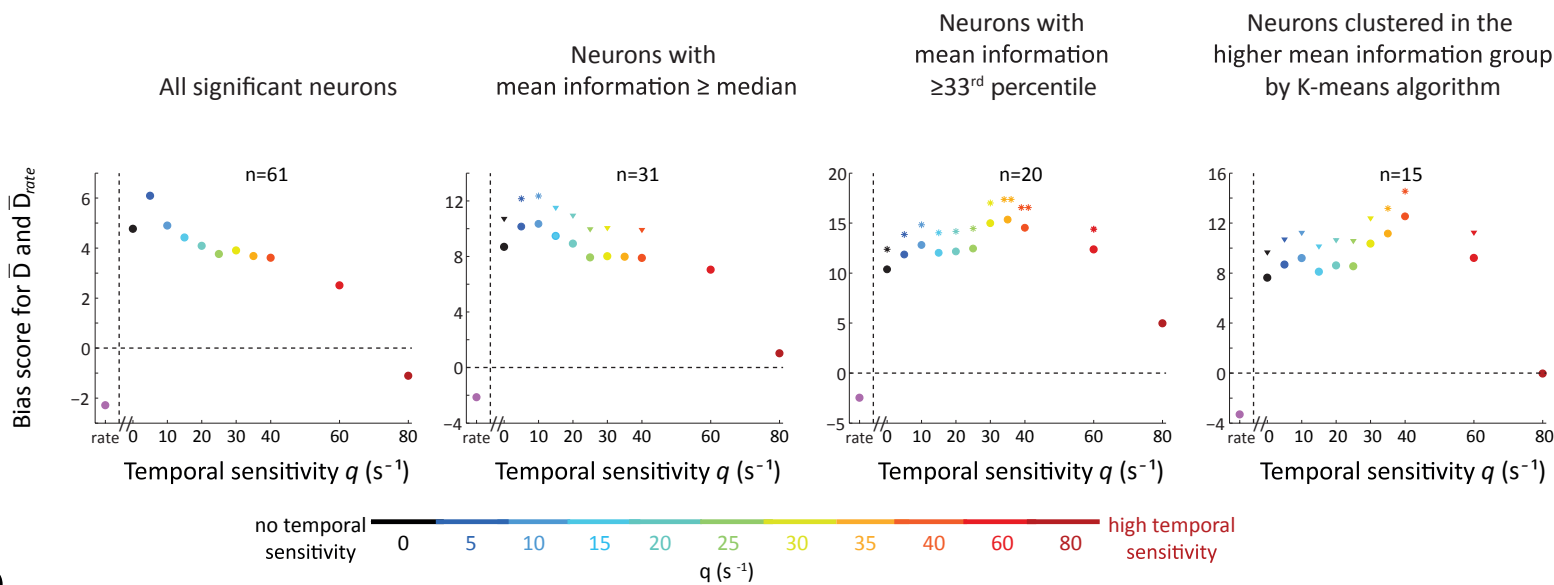

**b**

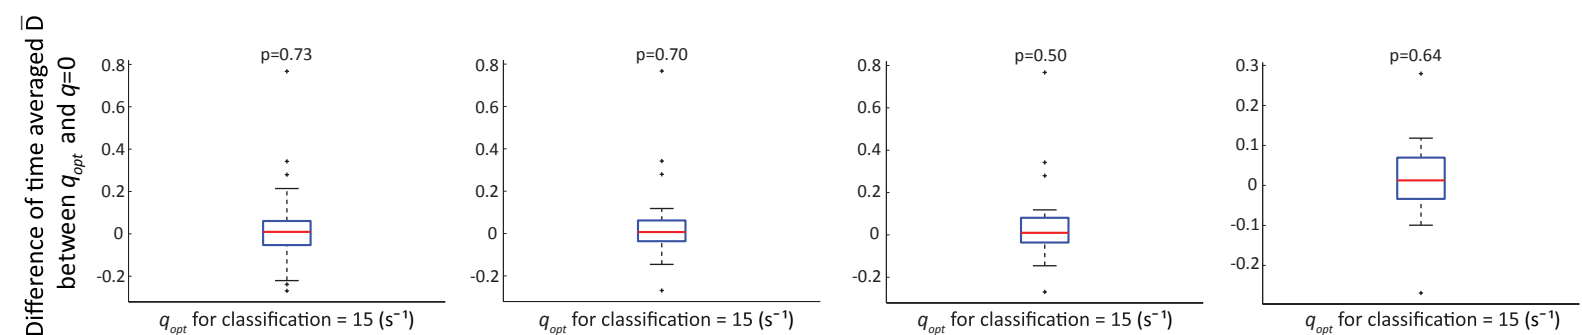

## Monkey P

**c**

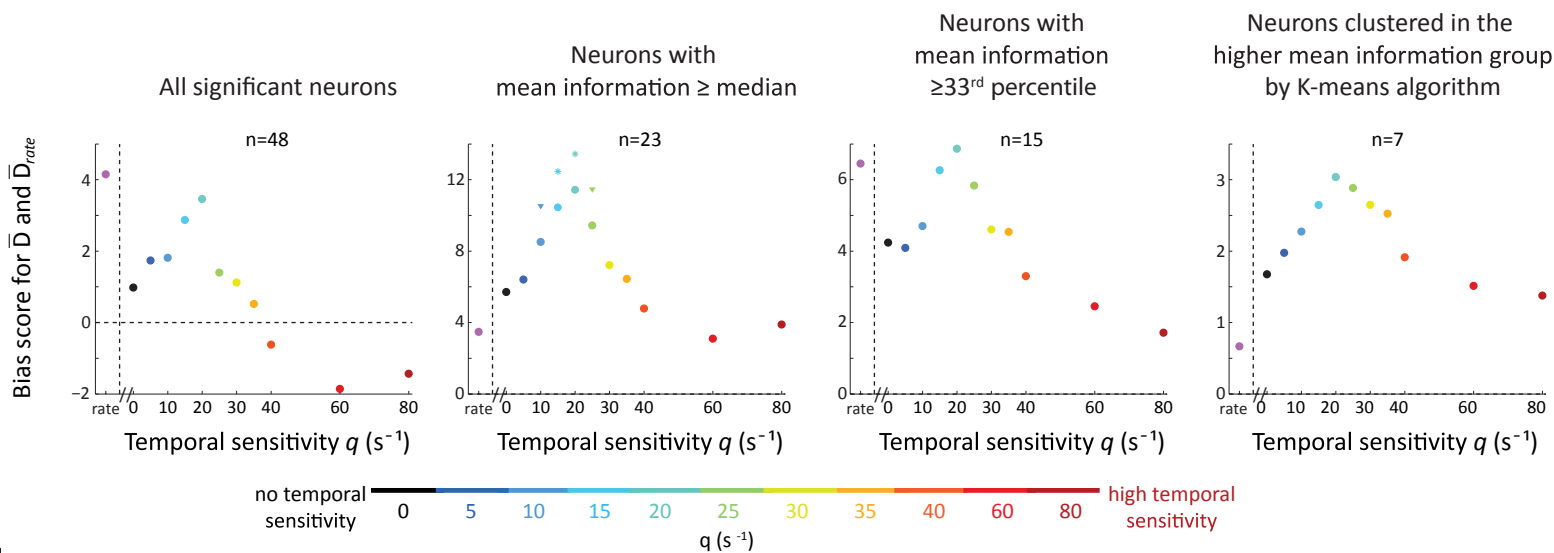

**d**

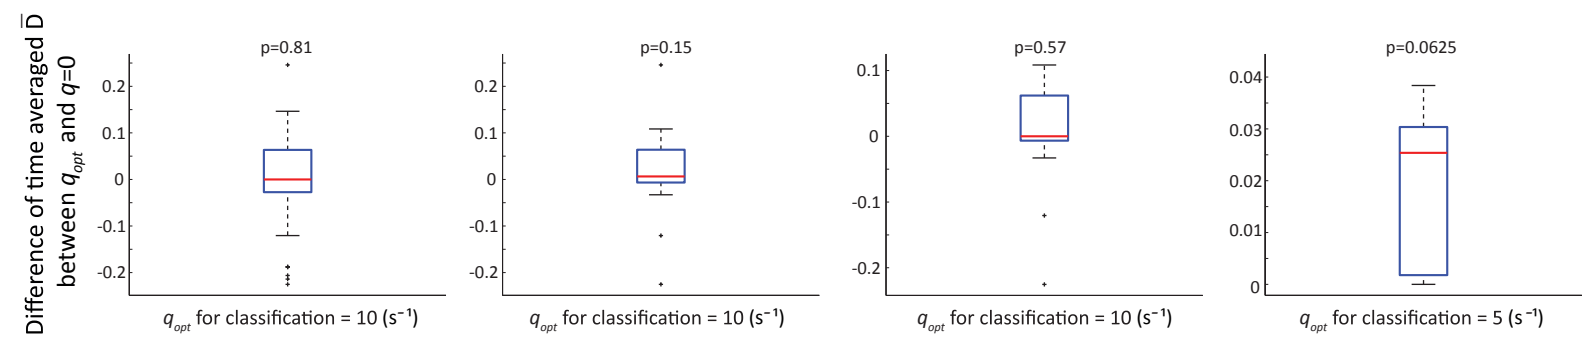

Supplement: pbio.1002222.s013.pdf [file pbio.1002222.s013.pdf]
