# Supplementary material for: Spatiotemporal Spike Coding of Behavioral Adaptation in the Dorsal Anterior Cingulate Cortex
Source: PubMed Central journal article supplement (PMC4534466; doi:10.1371/journal.pbio.1002222), 2015-08-12
Supplement: pbio.1002222.s014.pdf [file pbio.1002222.s014.pdf]

|          |                                       | Behavioral adaptation | Repetition     |
|----------|---------------------------------------|-----------------------|----------------|
| Monkey M | 1 <sup>st</sup> reward discrimination | 30 (16-40)            | 97 (62-130.25) |
|          | Error discrimination                  | 38 (27-47)            | 88.5 (68-120)  |
| Monkey P | 1 <sup>st</sup> reward discrimination | 17 (14-21)            | 60.5 (50-69)   |
|          | Error discrimination                  | 27 (21-32)            | 59 (47.5-71)   |
