# Supplementary material for: Spatiotemporal Spike Coding of Behavioral Adaptation in the Dorsal Anterior Cingulate Cortex
Source: PubMed Central journal article supplement (PMC4534466; doi:10.1371/journal.pbio.1002222), 2015-08-12
Supplement: pbio.1002222.s015.pdf [file pbio.1002222.s015.pdf]

|                                             | <b>Monkey M</b>                                                    | <b>Monkey P</b>                                                | <b>Both monkeys</b>                                                |
|---------------------------------------------|--------------------------------------------------------------------|----------------------------------------------------------------|--------------------------------------------------------------------|
| Difference of mean number of aborted trials | Median=0.19<br>$p_{\text{signrank}}=5.3 \cdot 10^{-4}$             | Median=0.095<br>$p_{\text{signrank}}=0.15$                     | Median=0.16<br>$p_{\text{signrank}}=3.2 \cdot 10^{-4}$             |
| Difference of probability of errors         | Median=0, mean= $-9.2 \cdot 10^{-3}$<br>$p_{\text{signrank}}=0.31$ | Median=0, mean= $9.7 \cdot 10^{-4}$<br>$p_{\text{signrank}}=1$ | Median=0, mean= $-5.9 \cdot 10^{-3}$<br>$p_{\text{signrank}}=0.36$ |
