# Supplementary material for: Spatiotemporal Spike Coding of Behavioral Adaptation in the Dorsal Anterior Cingulate Cortex
Source: PubMed Central journal article supplement (PMC4534466; doi:10.1371/journal.pbio.1002222), 2015-08-12
Supplement: pbio.1002222.s016.pdf [file pbio.1002222.s016.pdf]

|                                                             | 1 <sup>st</sup> reward discrimination       |                                              |                                              | Errors discrimination                        |                                              |                                             |
|-------------------------------------------------------------|---------------------------------------------|----------------------------------------------|----------------------------------------------|----------------------------------------------|----------------------------------------------|---------------------------------------------|
|                                                             | Monkey M                                    | Monkey P                                     | Both monkeys                                 | Monkey M                                     | Monkey P                                     | Both monkeys                                |
| <b>Distribution of <math>k_{opt}</math></b>                 | Diff. electrodes<br>mean=1.19<br>median=1.5 | Diff. electrodes<br>mean=1.13<br>median=1.25 | Diff. electrodes<br>mean=1.15<br>median=1.25 | Diff. electrodes<br>mean=1.48<br>median=1.75 | Diff. electrodes<br>mean=1.17<br>median=1.25 | Diff. electrodes<br>mean=1.26<br>median=1.5 |
|                                                             | Same electrode<br>mean=1.21<br>median=1.375 | Same electrode<br>mean=1.16<br>median=1.25   | Same electrode<br>mean=1.18<br>median=1.25   | Same electrode<br>mean=1.08<br>median=1.125  | Same electrode<br>mean=0.87<br>median=1      | Same electrode<br>mean=0.96<br>median=1     |
|                                                             | $p_{ranksum}=0.95$                          | $p_{ranksum}=0.81$                           | $p_{ranksum}=0.83$                           | $p_{ranksum}=0.020$                          | $p_{ranksum}=0.012$                          | $p_{ranksum}=2.0 \cdot 10^{-3}$             |
| <b>Proportion of pairs for which <math>k_{opt}=0</math></b> | Diff. electrodes<br>4/43=0.093              | Diff. electrodes<br>15/82=0.18               | Diff. electrodes<br>19/125=0.15              | Diff. electrodes<br>3/51=0.059               | Diff. electrodes<br>16/128=0.125             | Diff. electrodes<br>19/179=0.11             |
|                                                             | Same electrode<br>4/20=0.20                 | Same electrode<br>4/32=0.125                 | Same electrode<br>8/52=0.15                  | Same electrode<br>7/34=0.21                  | Same electrode<br>13/48=0.27                 | Same electrode<br>20/82=0.24                |
|                                                             | $p_{fisher}=0.17$                           | $p_{fisher}=0.49$                            | $p_{fisher}=0.91$                            | $p_{fisher}=0.063$                           | $p_{fisher}=0.031$                           | $p_{fisher}=0.0037$                         |
